# Supplementary material for: Cluster-randomized controlled trial of the effects of free glasses on purchase of children's glasses in China: The PRICE (Potentiating Rural Investment in Children's Eyecare) study
Source: PubMed Central journal article supplement (PMC5697864; doi:10.1371/journal.pone.0187808), 2017-11-21
Supplement: pone.0187808.s002.pdf [file pone.0187808.s002.pdf]

调查员编码： \_\_\_\_\_

填表日期： \_\_\_\_\_

问卷编码：（《学校编  》）

《学生编码》

# 小学生基本情况调查

同学你好：

今天让大家来填写一份问卷。我们会为你的答案保密，你的答案不会告诉调查组以外的任何人。这些问题也并没有标准答案，希望你不要有任何顾虑，跟随我们准确、如实、完整地填写这份调查表。如果你在填这份问卷时有任何问题，请随时举手问我们。衷心感谢你对本次调研工作的积极支持与配合！祝你身体健康！学习进步！

农村教育行动计划课题组

（《省》）省（《县》）县（区） \_\_\_\_\_ 镇（乡） \_\_\_\_\_ 小学 \_\_\_\_\_ 年级 \_\_\_\_\_ 班

姓名： \_\_\_\_\_

请填写你座位所在的排和列（最靠近讲台的一排为第一排；最靠近门的一边为第一列）：

\_\_\_\_\_ 排 \_\_\_\_\_ 列

你的民族？（请在下表中你所在的民族后打钩）

|        |  |     |  |    |  |     |  |
|--------|--|-----|--|----|--|-----|--|
| 汉族     |  | 傣族  |  | 彝族 |  | 白族  |  |
| 拉祜族    |  | 景颇族 |  | 佤族 |  | 哈尼族 |  |
| 其他，请注明 |  |     |  |    |  |     |  |

答题须知：

1. 每个表格中有三列：“问题”、“单位/选项”和“答案”。如果是选择题，请将您认为最符合您情况和想法的选项的代码填在选项后面“答案”列的空格里。如果是问答题，请把您的答案用文字填在选项后面“答案”列的空格里。
2. 如无特别说明，本问卷中所有的问题都只选一个答案。
3. 数字要写阿拉伯数字，比如1、2、3。
4. 如果选择题选项中有“其他，请说明\_\_\_\_\_”这样的字样，您也选了这项，请在“答案”列中填上这项的代码，并在“答案”列同时填上需要说明的内容。
5. 不能用铅笔填写。



二、视力现状（续，仅第 19 题选择“2”或者“3”（有眼镜）的同学需要回答第 20-24 题）

| 问题                                       | 选项                                                                                                                                        | 答案 |
|------------------------------------------|-------------------------------------------------------------------------------------------------------------------------------------------|----|
| 20. 你平时戴眼镜吗？                             | 1=基本不戴；<br>2=学习的时候戴；<br>3=经常戴                                                                                                             |    |
| 21. 如果你不是经常戴眼镜，你自己主要是怎么考虑的？<br>（只能选一个答案） | 0=我经常戴眼镜；<br>1=担心戴了眼镜后视力越来越差；<br>2=担心戴了眼镜被别人笑话；<br>3=不戴眼镜也勉强看得见，等以后看不清楚了再戴；<br>4=觉得戴着眼镜行动(或体育活动)不方便；<br>5=戴眼镜不舒服，会觉得头晕、鼻梁受压等；<br>6=其他，请注明 |    |
| 22. 你的家长对你戴眼镜是什么态度？                      | 1=支持； 2=无所谓； 3=反对                                                                                                                         |    |
| 23. 你的眼镜是在哪里配的？                          | 1=医院； 2=眼镜店； 3=其他，请说明                                                                                                                     |    |
| 24. 你配眼镜花了多少钱？                           | 1=100 元以下；<br>2=100 元到 199 元；<br>3=200 元到 299 元；<br>4=300 元到 399 元；<br>5=400 元到 499 元；<br>6=500 元及以上                                      |    |
| Text                                     |                                                                                                                                           |    |

三、眼镜使用问题（对于以下说法，同意写 1；不同意写 2；不知道写 3）

|                                 |                    |  |
|---------------------------------|--------------------|--|
| 25. 眼保健操能矫正近视                   | 1=同意； 2 不同意； 3=不知道 |  |
| 26. 戴眼镜能矫正近视                    | 1=同意； 2 不同意； 3=不知道 |  |
| 27. 对于成绩比较差，同时又近视的学生，戴眼镜会提高学习成绩 | 1=同意； 2 不同意； 3=不知道 |  |
| 28. 对于看不清楚黑板的学生，戴眼镜会让他们看得更清楚    | 1=同意； 2 不同意； 3=不知道 |  |
| 29. 戴眼镜会导致视力越来越差                | 1=同意； 2 不同意； 3=不知道 |  |

四、家庭资产拥有情况

| 资产类别          | 1=有； 2=没有 | 资产类别         | 1=有； 2=没有 |
|---------------|-----------|--------------|-----------|
| 1. 小汽车        |           | 2. 照相机       |           |
| 3. 货车         |           | 4. 洗衣机       |           |
| 5. 摩托车或电动车    |           | 6. 空调        |           |
| 7. 拖拉机        |           | 8. 热水器       |           |
| 9. 大型农机具      |           | 10. 煤气/液化气炉具 |           |
| 11. 电脑        |           | 12. 抽油烟机     |           |
| 13. 拉网线（电脑上网） |           | 14. 电冰箱或冰柜   |           |
| 15. 电视机       |           | 16. 抽水马桶     |           |

谢谢，问卷结束！

# 学生视力筛查表

## 第一部分：视力筛查

1. 检查日期：2014年\_\_月\_\_日

| 裸眼视力                             |                                  |
|----------------------------------|----------------------------------|
| 2. 右眼                            | 3. 左眼                            |
| <input type="checkbox"/> 6/3     | <input type="checkbox"/> 6/3     |
| <input type="checkbox"/> 6/3.8   | <input type="checkbox"/> 6/3.8   |
| <input type="checkbox"/> 6/4.8   | <input type="checkbox"/> 6/4.8   |
| <input type="checkbox"/> 6/6     | <input type="checkbox"/> 6/6     |
| <input type="checkbox"/> 6/7.5   | <input type="checkbox"/> 6/7.5   |
| <input type="checkbox"/> 6/9.5   | <input type="checkbox"/> 6/9.5   |
| <input type="checkbox"/> 6/12    | <input type="checkbox"/> 6/12    |
| <input type="checkbox"/> 6/15    | <input type="checkbox"/> 6/15    |
| <input type="checkbox"/> 6/19    | <input type="checkbox"/> 6/19    |
| <input type="checkbox"/> 6/24    | <input type="checkbox"/> 6/24    |
| <input type="checkbox"/> 6/30    | <input type="checkbox"/> 6/30    |
| <input type="checkbox"/> 6/38    | <input type="checkbox"/> 6/38    |
| <input type="checkbox"/> 6/48    | <input type="checkbox"/> 6/48    |
| <input type="checkbox"/> 6/60    | <input type="checkbox"/> 6/60    |
| <input type="checkbox"/> 6/76    | <input type="checkbox"/> 6/76    |
| <input type="checkbox"/> 6/96    | <input type="checkbox"/> 6/96    |
| <input type="checkbox"/> 6/120   | <input type="checkbox"/> 6/120   |
| <input type="checkbox"/> 6/152   | <input type="checkbox"/> 6/152   |
| <input type="checkbox"/> 6/192   | <input type="checkbox"/> 6/192   |
| <input type="checkbox"/> 6/240   | <input type="checkbox"/> 6/240   |
| <input type="checkbox"/> < 6/240 | <input type="checkbox"/> < 6/240 |

4. 现在是否有眼镜？

没有，转到第二部分

有，没带来，转到第二部分

有，带来了

如果有并且带来了，测试戴上现有眼镜视力：

| 戴镜视力                             |                                  |
|----------------------------------|----------------------------------|
| 5. 右眼                            | 6. 左眼                            |
| <input type="checkbox"/> 6/3     | <input type="checkbox"/> 6/3     |
| <input type="checkbox"/> 6/3.8   | <input type="checkbox"/> 6/3.8   |
| <input type="checkbox"/> 6/4.8   | <input type="checkbox"/> 6/4.8   |
| <input type="checkbox"/> 6/6     | <input type="checkbox"/> 6/6     |
| <input type="checkbox"/> 6/7.5   | <input type="checkbox"/> 6/7.5   |
| <input type="checkbox"/> 6/9.5   | <input type="checkbox"/> 6/9.5   |
| <input type="checkbox"/> 6/12    | <input type="checkbox"/> 6/12    |
| <input type="checkbox"/> 6/15    | <input type="checkbox"/> 6/15    |
| <input type="checkbox"/> 6/19    | <input type="checkbox"/> 6/19    |
| <input type="checkbox"/> 6/24    | <input type="checkbox"/> 6/24    |
| <input type="checkbox"/> 6/30    | <input type="checkbox"/> 6/30    |
| <input type="checkbox"/> 6/38    | <input type="checkbox"/> 6/38    |
| <input type="checkbox"/> 6/48    | <input type="checkbox"/> 6/48    |
| <input type="checkbox"/> 6/60    | <input type="checkbox"/> 6/60    |
| <input type="checkbox"/> 6/76    | <input type="checkbox"/> 6/76    |
| <input type="checkbox"/> 6/96    | <input type="checkbox"/> 6/96    |
| <input type="checkbox"/> 6/120   | <input type="checkbox"/> 6/120   |
| <input type="checkbox"/> 6/152   | <input type="checkbox"/> 6/152   |
| <input type="checkbox"/> 6/192   | <input type="checkbox"/> 6/192   |
| <input type="checkbox"/> 6/240   | <input type="checkbox"/> 6/240   |
| <input type="checkbox"/> < 6/240 | <input type="checkbox"/> < 6/240 |

## 第二部分：入选标准

7. 是否入选

是，任一眼裸眼视力 $\leq$  6/12(0.5)

否
