# Supplementary material for: Cluster-randomized controlled trial of the effects of free glasses on purchase of children's glasses in China: The PRICE (Potentiating Rural Investment in Children's Eyecare) study
Source: PLoS One. 2017 Nov 21;12(11):e0187808. doi: 10.1371/journal.pone.0187808 (PMC5697864; doi:10.1371/journal.pone.0187808)
Supplement: S4 File — Chinese version of endline student questionnaire. (PDF) [file pone.0187808.s004.pdf]

调查员编码: \_\_\_\_\_

填表日期: \_\_\_\_\_

问卷编码 ID: ( )

# 加强农村儿童眼保健项目

## 小学生配戴眼镜情况调查

亲爱的同学:

你好! 今天请你帮我们填写一份问卷。这份问卷能帮助我们了解你的视力和眼镜的情况。我们会为你的答案保密, 不会将你的答案告诉调查组以外的任何人。我们这些问题也没有标准答案, 希望你不要有任何顾虑, 准确、如实、完整地告诉我们你的想法即可。如果你在填写问卷过程中有任何问题, 请随时举手示意我们的工作人员。衷心感谢你对我们调研工作的支持! 祝你身体健康! 学习进步!

农村教育行动计划课题组

\_\_\_\_省\_\_\_\_市/县/区\_\_\_\_镇(乡)\_\_\_\_小学\_\_\_\_年级\_\_\_\_班

姓名: \_\_\_\_\_

答题须知:

1. 每个表格有三列: “问题”、“选项”和“答案”。如果是选择题, 请将你认为最符合你情况或想法的选项**代码**填写在“答案”列的空格里。如果你选择了“其他原因, 请告诉我们\_\_\_\_\_”这样的选项, 请在“答案”列中填上这个选项的代码, 并在横线上填写文字内容。
2. 如无特别说明, 本问卷中所有的问题都只选一个答案。
3. 数字请用阿拉伯数字, 比如1、2、3。
4. **请不要用铅笔填写。**

## 第一部分：关于你的眼镜

| 问题                                                                                               | 选项                                                                                                                                                                                             | 答案 |
|--------------------------------------------------------------------------------------------------|------------------------------------------------------------------------------------------------------------------------------------------------------------------------------------------------|----|
| 1. 请问你的出生日期是？（请将答案写在横线上）                                                                         | 出生日期：_____年_____月_____日                                                                                                                                                                        |    |
| 2. 你有眼镜吗？                                                                                        | 1=没有>>>>>>>>>>>>>>>（ <u>请直接做第四部分</u> ）；<br>2=有                                                                                                                                                 |    |
| 3. 你认为眼镜对学习和生活有帮助吗？                                                                              | 1=非常有帮助；                2=有一点帮助；<br>3=眼镜对我来说可有可无；    4=毫无帮助；                                                                                                                                   |    |
| 4. 你觉得自己戴眼镜好看吗？                                                                                  | 1=好看；                        2=一般；<br>3=不好看；                      4=无所谓，我不关心                                                                                                                   |    |
| 5. 家长对你戴眼镜是什么态度？                                                                                 | 1=支持；                        2=无所谓；                3=反对                                                                                                                                        |    |
| 6. 你是否经常戴眼镜？                                                                                     | 1=基本不戴；                2=学习的时候戴；    3=经常戴                                                                                                                                                      |    |
| 7. 如果你 <u>基本不戴或者仅学习的时候戴眼镜</u> ，你自己 <u>主要</u> 是怎么考虑的？<br>（ <u>单选</u> ，答案序号写于答案列，若选 7 请将具体原因填在横线上） | 0=我经常戴眼镜（如果第 6 题选择“3”，此题请选择“0”）<br>1=担心戴了眼镜后视力越来越差；<br>2=担心戴了眼镜被别人笑话或欺负；<br>3=不戴眼镜也勉强看得见，等以后看不清楚了再戴；<br>4=觉得戴着眼镜行动(或体育活动)不方便；<br>5=戴眼镜不舒服，会觉得头晕、鼻梁受压等；<br>6=我不喜欢自己戴眼镜的样子；<br>7=其他原因，请告诉我们_____ |    |
| 8. 你现在戴的眼镜是什么时候配的？（答案序号写于答案列，并将具体时间填在横线上）                                                        | 1=上学期项目组做视力检查后<br>2=我在上学期项目组做视力检查前就有眼镜了，我在_____年___月配眼镜                                                                                                                                        |    |
| 9. 你的眼镜属于哪种情况？<br>（你有没有项目眼镜？）                                                                    | 0=不是项目组的眼镜；》》》直接进入第三部分<br>1=免费眼镜；》》第二部分<br>2=升级眼镜，交了 100 元；》》第二部分<br>3=升级眼镜，交了 200 元；》》第二部分                                                                                                    |    |

第二部分：对项目眼镜的评价——选择项目眼镜的同学（第9题选择1.2或者3）请回答10-12题：

|                                                                                              |                                                                                                                                       |  |
|----------------------------------------------------------------------------------------------|---------------------------------------------------------------------------------------------------------------------------------------|--|
| <p>10. 如果你的眼镜是项目组升级眼镜，当时买升级眼镜的<b>主要原因</b>是什么？<br/>（<b>单选</b>，答案序号写于答案列，若选 4 请将具体原因填在横线上）</p> | <p>0=我选的是免费眼镜（<b>如果第 9 题选择“1”，此题请选“0”</b>）<br/>1=担心免费眼镜不可靠，额外花钱的眼镜可能质量更好；<br/>2=额外花钱的眼镜样子更好看；<br/>3=父母帮我选择的；<br/>4=其他原因，请列出：_____</p> |  |
| <p>11. 你对你所挑选的项目组眼镜款式作何评价？</p>                                                               | <p>1=好看，我很喜欢；      2=一般；<br/>3=不好看；      4=无所谓，反正是免费的</p>                                                                             |  |
| <p>12. 你使用项目组的眼镜看东西，感觉清晰吗？</p>                                                               | <p>1=清晰；      2=一般；      3=不清晰；</p>                                                                                                   |  |

第三部分：眼镜的价格——配戴非项目眼镜的同学请回答第 13 题

|                                                                    |                                                                                                                                                         |  |
|--------------------------------------------------------------------|---------------------------------------------------------------------------------------------------------------------------------------------------------|--|
| <p>13. 如果你的眼镜不是项目组的眼镜，你的眼镜大概多少钱？</p> <p><u>（选择项目眼镜的同学跳过此题）</u></p> | <p>1=100 元以下；<br/>2=100 元到 199 元；<br/>3=200 元到 299 元；<br/>4=300 元到 399 元；<br/>5=400 元到 499 元；<br/>6=500 元及以上</p> <p>如果你知道眼镜的具体价格，请在横线上填写具体价格：_____元</p> |  |
|--------------------------------------------------------------------|---------------------------------------------------------------------------------------------------------------------------------------------------------|--|

第四部分：第 2 题选择 1（没有眼镜） / 第 9 题选择“0”（配了非项目的眼镜）的同学回答第四部分

| 问题                                                             | 选项                                                                                                                                                                                                                                                        | 答案 |
|----------------------------------------------------------------|-----------------------------------------------------------------------------------------------------------------------------------------------------------------------------------------------------------------------------------------------------------|----|
| 14. 你是否收到项目组发的处方或者眼镜券？                                         | 1=我收到配镜处方；（请回答第 15 题）<br>2=我收到眼镜券； （请回答第 16 题）<br>3=都没有； >>>>>>>>> <b>问卷结束</b>                                                                                                                                                                            |    |
| 15. 如果收到处方，你为什么没去配眼镜？<br>（单选，答案序号写于答案列，若选 9 请将具体原因填在横线上）       | 1=担心戴了眼镜后视力越来越差；<br>2=我认识的人基本没有人戴眼镜，担心戴了眼镜被别人笑话或者被欺负；<br>3=不戴眼镜也勉强看得见，等以后看不清楚了再戴；<br>4=觉得戴着眼镜行动(或体育活动)不方便；<br>5=家长不重视我的视力情况；<br>6=爸爸、妈妈不相信处方单的准确性；<br>7=眼镜太贵，我家里买不起<br>8=爸爸、妈妈或亲朋好友不方便带我去取眼镜（没有时间、交通不方便）；<br>9=其他原因，请告诉我们：_____                           |    |
| 16. 如果收到眼镜券，你为什么没有选我们项目的眼镜？<br>（单选，答案序号写于答案列，若选 9 请将具体原因填在横线上） | 0=我自己已经有眼镜，暂时不需要新眼镜；<br>1=担心戴了眼镜后视力越来越差；<br>2=我的周围基本没有人戴眼镜，担心戴了眼镜被别人笑话或者欺负；<br>3=不戴眼镜也勉强看得见，等以后看不清楚了再戴；<br>4=觉得戴着眼镜行动(或体育活动)不方便；<br>5=家长不重视我的视力情况；<br>6=爸爸、妈妈不相信可以领到免费的眼镜；<br>7=爸爸、妈妈和亲朋好友不方便带我去取眼镜（没有时间、交通不方便）；<br>8=项目组通知领眼镜的时间太短<br>9=其他原因，请告诉我们：_____ |    |

亲爱的同学，问卷到此结束。

谢谢你支持我们的项目调查工作！祝你学习进步！

视力复查表

第一部分：视力检查

3. 是否有眼镜？  
☐ 否，结束问卷  
☐ 有，未带来，结束问卷  
☐ 有，带来了，查戴镜视力 ☐ 项目眼镜

☐ 非项目眼镜

| 裸眼视力                             |                                  | 戴镜视力                             |                                  |
|----------------------------------|----------------------------------|----------------------------------|----------------------------------|
| 1. 右眼                            | 2. 左眼                            | 4. 右眼                            | 5. 左眼                            |
| <input type="checkbox"/> 6/3     | <input type="checkbox"/> 6/3     | <input type="checkbox"/> 6/3     | <input type="checkbox"/> 6/3     |
| <input type="checkbox"/> 6/3.8   | <input type="checkbox"/> 6/3.8   | <input type="checkbox"/> 6/3.8   | <input type="checkbox"/> 6/3.8   |
| <input type="checkbox"/> 6/4.8   | <input type="checkbox"/> 6/4.8   | <input type="checkbox"/> 6/4.8   | <input type="checkbox"/> 6/4.8   |
| <input type="checkbox"/> 6/6     | <input type="checkbox"/> 6/6     | <input type="checkbox"/> 6/6     | <input type="checkbox"/> 6/6     |
| <input type="checkbox"/> 6/7.5   | <input type="checkbox"/> 6/7.5   | <input type="checkbox"/> 6/7.5   | <input type="checkbox"/> 6/7.5   |
| <input type="checkbox"/> 6/9.5   | <input type="checkbox"/> 6/9.5   | <input type="checkbox"/> 6/9.5   | <input type="checkbox"/> 6/9.5   |
| <input type="checkbox"/> 6/12    | <input type="checkbox"/> 6/12    | <input type="checkbox"/> 6/12    | <input type="checkbox"/> 6/12    |
| <input type="checkbox"/> 6/15    | <input type="checkbox"/> 6/15    | <input type="checkbox"/> 6/15    | <input type="checkbox"/> 6/15    |
| <input type="checkbox"/> 6/19    | <input type="checkbox"/> 6/19    | <input type="checkbox"/> 6/19    | <input type="checkbox"/> 6/19    |
| <input type="checkbox"/> 6/24    | <input type="checkbox"/> 6/24    | <input type="checkbox"/> 6/24    | <input type="checkbox"/> 6/24    |
| <input type="checkbox"/> 6/30    | <input type="checkbox"/> 6/30    | <input type="checkbox"/> 6/30    | <input type="checkbox"/> 6/30    |
| <input type="checkbox"/> 6/38    | <input type="checkbox"/> 6/38    | <input type="checkbox"/> 6/38    | <input type="checkbox"/> 6/38    |
| <input type="checkbox"/> 6/48    | <input type="checkbox"/> 6/48    | <input type="checkbox"/> 6/48    | <input type="checkbox"/> 6/48    |
| <input type="checkbox"/> 6/60    | <input type="checkbox"/> 6/60    | <input type="checkbox"/> 6/60    | <input type="checkbox"/> 6/60    |
| <input type="checkbox"/> 6/76    | <input type="checkbox"/> 6/76    | <input type="checkbox"/> 6/76    | <input type="checkbox"/> 6/76    |
| <input type="checkbox"/> 6/96    | <input type="checkbox"/> 6/96    | <input type="checkbox"/> 6/96    | <input type="checkbox"/> 6/96    |
| <input type="checkbox"/> 6/120   | <input type="checkbox"/> 6/120   | <input type="checkbox"/> 6/120   | <input type="checkbox"/> 6/120   |
| <input type="checkbox"/> 6/152   | <input type="checkbox"/> 6/152   | <input type="checkbox"/> 6/152   | <input type="checkbox"/> 6/152   |
| <input type="checkbox"/> 6/192   | <input type="checkbox"/> 6/192   | <input type="checkbox"/> 6/192   | <input type="checkbox"/> 6/192   |
| <input type="checkbox"/> 6/240   | <input type="checkbox"/> 6/240   | <input type="checkbox"/> 6/240   | <input type="checkbox"/> 6/240   |
| <input type="checkbox"/> ≤ 6/240 |

二部分质检 6. 是否需要质检？  
☐ 否，结束问卷；  
☐ 是，进入质检 ☐

验光结果：

|    | 球镜  | 柱镜  | 轴向  | 最佳矫正视力 |
|----|-----|-----|-----|--------|
| 右眼 | 7.  | 8.  | 9.  | 10.    |
| 左眼 | 11. | 12. | 13. | 14.    |

处方结果：

|    | 球镜  | 柱镜  | 轴向  | 最佳矫正视力 | 瞳距  |
|----|-----|-----|-----|--------|-----|
| 右眼 | 15. | 16. | 17. | 18.    | 23. |
| 左眼 | 19. | 20. | 21. | 22.    |     |

焦度计检测结果：

|    | 球镜  | 柱镜  | 轴向  | 最佳矫正视力 | 瞳距  |
|----|-----|-----|-----|--------|-----|
| 右眼 | 24. | 25. | 26. | 27.    | 32. |
| 左眼 | 28. | 29. | 30. | 31.    |     |

33. 焦度计检测是否和配镜处方一致？  
☐ 是，误差范围内；  
☐ 否。
